# Supplementary material for: Techno-economic and environmental impacts assessments of sustainable aviation fuel production from forest residues
Source: Royal Society of Chemistry journal article supplement (doi:10.1039/d4se00749b), 2024-01-01
Supplement: d4se00749b1.pdf [file d4se00749b1.pdf]

## Techno-economic and environmental impacts assessments of sustainable aviation fuel production from forest residue

Table S1: Breakdown of Direct fixed capital cost of SAF plant

| Cost category                           | Estimation assumptions                                                      |
|-----------------------------------------|-----------------------------------------------------------------------------|
| Total equipment purchases cost ( $PC$ ) | Sum of listed equipment purchases cost and unlisted equipment purchase cost |
| Process piping (a)                      | $0.31 \times PC^1$                                                          |
| Instrumentation (b)                     | $0.13 \times PC^1$                                                          |
| Insulation (c)                          | $0.03 \times PC^2$                                                          |
| Electrical (d)                          | $0.10 \times PC^1$                                                          |
| Buildings (e)                           | $0.29 \times PC^1$                                                          |
| Yard improvement (f)                    | $0.10 \times PC^1$                                                          |
| Auxiliary facilities (g)                | $0.20 \times PC^1$                                                          |
| Installation (h)                        | $0.50 \times PC^{2,3}$                                                      |
| <i>Total plant direct cost (TPDC)</i>   | $PC + a + b + c + d + e + f + g + h$                                        |
| Engineering (i)                         | $0.15 \times TPDC^4$                                                        |
| Construction (j)                        | $0.10 \times TPDC^4$                                                        |
| <i>Total plant other cost (TPOC)</i>    | $k$                                                                         |
| <i>Contingency (k)</i>                  | $0.1 \times (TPDC + TPIC)^5$                                                |
| <i>Direct fixed capital cost (DFC)</i>  | $DFC = TPDC + TPIC + TPOC$                                                  |
| Startup and validation cost             | 5% of $DFC$                                                                 |
| Working capital                         | Operating cost for one month                                                |
| Total investment ( $TI$ )               | $DFC + \text{Startup cost} + \text{Working capital}$                        |

Table S2. Catalyst Details

|                          | Catalyst                              | Feed flow rate (L/H) | WHSV (L <sub>cat</sub> -1 h <sup>-1</sup> ) | Catalyst req for 3 years (gm) | Cost/kg | Total cost per 3 year |
|--------------------------|---------------------------------------|----------------------|---------------------------------------------|-------------------------------|---------|-----------------------|
| Water Gas Shift Reaction | Cu-ZnO-Al <sub>2</sub> O <sub>3</sub> | 38037962             | 15.7 <sup>6</sup>                           | 2422800.00                    | 5       | 12114                 |
| Fischer Tropsch Process  | Cobalt                                | 68058732             | 20 <sup>7</sup>                             | 3402936.6                     | 18      | 61252.8               |
| Hydrocraking (kg/hr)     | 0.5Pt/Y(100)35A                       | 6957                 | 2.3 <sup>8</sup>                            | 3024.782609                   | 20      | 60495.6               |

## FT Reactions

1. **Methane (CH<sub>4</sub>):** The formation of methane generally increases with temperature, which indicates a shift towards lighter hydrocarbons and possibly due to the hydrogenation of smaller intermediate carbon species.

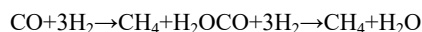

2. **C<sub>2</sub>-C<sub>4</sub> Hydrocarbons:** These include ethane, propane, and butanes. Their selectivity also tends to increase slightly at higher temperatures.

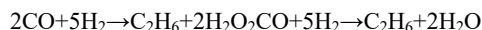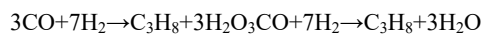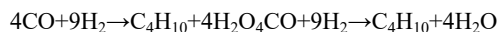

3. **C<sub>5+</sub> Hydrocarbons:** These are heavier fractions, including waxes and long-chain alkanes, which are more desirable for diesel and wax production. The selectivity towards C<sub>5+</sub> hydrocarbons slightly decreases from 200 °C to 215 °C, reflecting a reduced chain growth probability at higher temperatures.

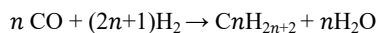

4. **C<sub>5</sub>-C<sub>10</sub> Hydrocarbons**

These include lighter liquid fuels like gasoline components. The reaction can be generalized as:

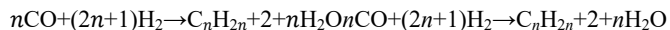

For n = 5 to 10:

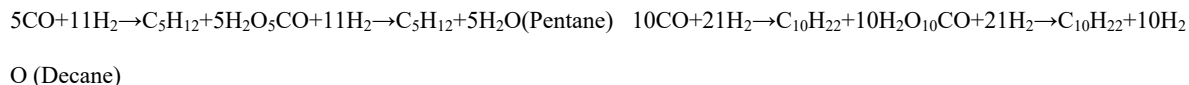

5. **C<sub>11</sub>-C<sub>18</sub> Hydrocarbons**

These are typically found in diesel and jet fuel ranges.

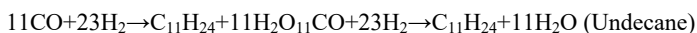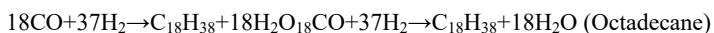

6. **C<sub>19</sub>-C<sub>34</sub> Hydrocarbons**

These heavier hydrocarbons are important for producing high-quality diesel and waxes.

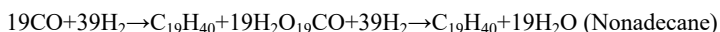

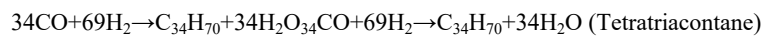

Table S3: Conversion factors and degree of removal of various compounds in the various processes

| Process                   | Compound                          | Factor               | Type       | reference        |
|---------------------------|-----------------------------------|----------------------|------------|------------------|
| Gas cleaning              | H <sub>2</sub> S, CO <sub>2</sub> | Reduction to 0.1 ppm | Removal    | <sup>9</sup>     |
| Watergas shift reaction   | CO                                | 85                   | Conversion | <sup>10</sup>    |
| Fischer-Tropsch synthesis | CO                                | 98                   | Conversion | <sup>11,12</sup> |
| Hydrotreatment            | C <sub>17+</sub>                  | 70                   | Yield      | <sup>8</sup>     |

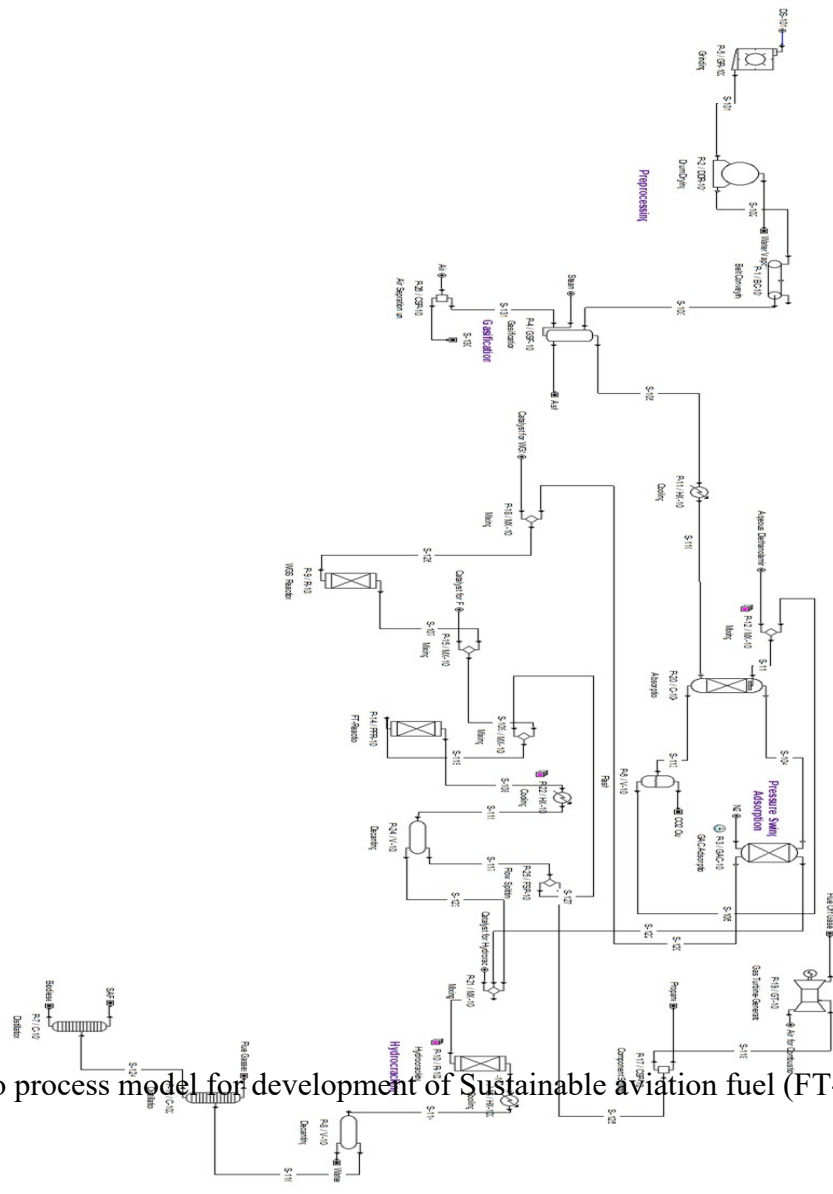

Fig S1: SuperPro process model for development of Sustainable aviation fuel (FT-SAF-SPK).

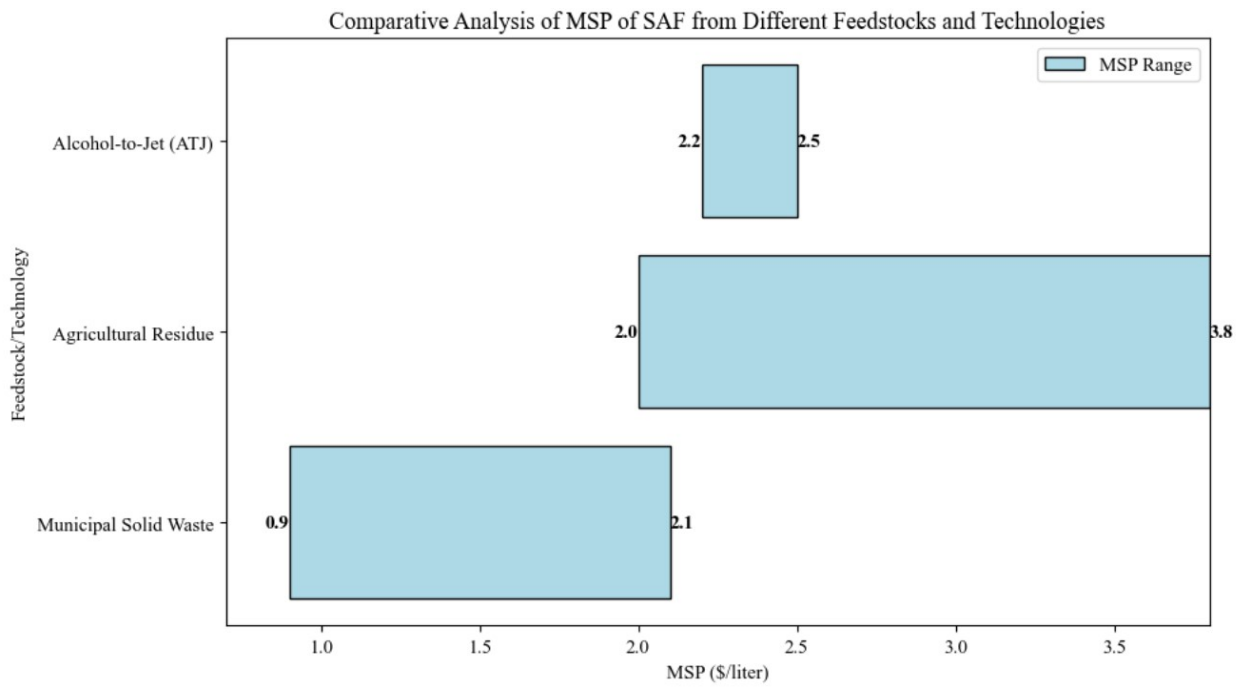

Fig S2: Comparative analysis of MSP of SAF

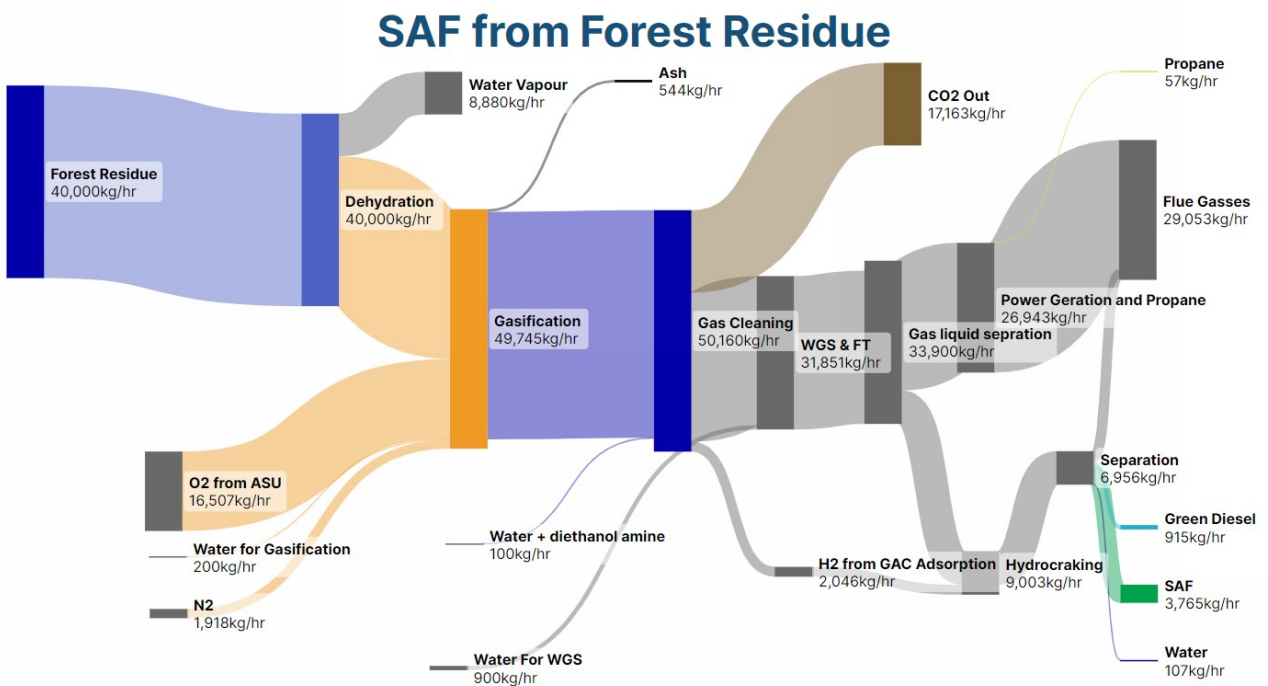

Fig S3: Net Mass Flows and Energy balance Sankey diagram.

Table S4: Cumulative Energy Demand

| Impact category (Unit :MJ)         | Total    | Proxy_ Water, at user NREL/US U | Forest residue, | Diethanola mine | Steam, for chemical processes, | Diesel   | Electricity Mix eGRIS 2022/US US-EI U | Disposal, liquid wastes, unspecified to waste water treatment/ NREL/RN A U | Disposal, wood ash mixture, pure, 0% water, to sanitary landfill/US * US-EI U | Proxy_Disposal, inert solid waste, to inert material landfill NREL/US U | Proxy_Disposal, heavy alkalide naphtha, to sanitary landfill NREL/US U |
|------------------------------------|----------|---------------------------------|-----------------|-----------------|--------------------------------|----------|---------------------------------------|----------------------------------------------------------------------------|-------------------------------------------------------------------------------|-------------------------------------------------------------------------|------------------------------------------------------------------------|
| Total                              | 2.08     | 0.00132                         | 2.724           | 0.020           | 1.262                          | -0.28275 | -1.668                                | 0.000549                                                                   | 5.85E-04                                                                      | 0.008093                                                                | 0.022                                                                  |
| Non renewable, fossil              | -0.086   | 0.00085                         | 0.056           | 0.019           | 1.251                          | -0.27805 | -1.166                                | 0.000418                                                                   | 5.49E-04                                                                      | 0.007854                                                                | 0.020                                                                  |
| Non-renewable, nuclear             | -0.375   | 0.00032                         | 0.0009          | 0.001           | 0.0087                         | -4.0E-04 | -0.384                                | 9.92E-05                                                                   | 2.82E-05                                                                      | 0.000186                                                                | 0.0015                                                                 |
| Non-renewable, biomass             | 4.46E-07 | 4.84E-10                        | 6.74E-08        | 8.7E-09         | 1.02E-06                       | -2.1E-09 | -6.9E-07                              | 3.89E-10                                                                   | 8.9E-10                                                                       | 1.33E-08                                                                | 2.57E-08                                                               |
| Renewable, biomass                 | 2.648    | 8.13E-05                        | 2.666           | 0.0001          | 7.3E-04                        | -1.3E-04 | -0.019                                | 7.39E-06                                                                   | 2.26E-06                                                                      | 1.53E-05                                                                | 1.01E-04                                                               |
| Renewable, wind, solar, geothermal | -0.067   | 3.52E-05                        | 1.2E-05         | 0.0001          | 9.2E-04                        | -1.4E-04 | -0.068                                | 1.02E-05                                                                   | 2.72E-06                                                                      | 1.76E-05                                                                | 1.69E-04                                                               |
| Renewable, water                   | -0.029   | 2.92E-05                        | 0.0001          | 0.0001          | 8.43E-04                       | -3.7E-04 | -0.030                                | 1.44E-05                                                                   | 3.1E-06                                                                       | 2.03E-05                                                                | 1.39E-04                                                               |

#### Assumptions in soil carbon change calculations:

- We used energy beneficial case in for production of SAF from forest residue to evaluate carbon change in soil. In previous study, Scenario 1, one hectare can produce approximately ~338.8 dry metric tons (Mg) of biomass over a 100-year period, suitable for biofuel production<sup>13</sup>. This calculation considers that 50% biomass is collectable for SAF production. This total is calculated based on repeating the 25-year rotation cycle four times, with each rotation producing 169.4 dry Mg ha<sup>-1</sup> of biomass. The yield of SAF from dried biomass is ~13%, hence 338 dry metric ton biomass can produce 43.94MT of SAF. The greenhouse gas (GHG) emissions associated with producing 1 kg of Sustainable Aviation Fuel (SAF) from forest residue are approximately 24.56 g CO<sub>2</sub>-eq/MJ. The 44MT of SAF will produce 1.1 MT CO<sub>2</sub> eq. The chemical composition and energy content per kilogram of SAF and conventional jet fuels are comparable, so they emit roughly the same amount of CO<sub>2</sub> when burned. Combustion of jet fuel releases about 3.15 kilograms of CO<sub>2</sub> per kilogram of fuel burned. SAF produced from biomass from one hectare over 100 hectors will produce 138.41-ton eq CO<sub>2</sub>.

Table S4: Description of soil carbon dynamics calculations (values in tCO<sub>2</sub> eq)

|                                                                                   | S1        |              |         |
|-----------------------------------------------------------------------------------|-----------|--------------|---------|
|                                                                                   | All decay | Pile Burning | Biofuel |
| Biogenic Carbon Uptake by Logs                                                    | -923.0    | -855.4       | -855.4  |
| Biogenic Carbon Uptake by Litter (Residues) and Residues for Biofuel/Pile Burning | -298.1    | -276.1       | -276.1  |
| Biogenic Carbon Uptake by Litter (Litterfall)                                     | -532.7    | -532.7       | -532.7  |
| Biogenic Carbon Uptake by Litter (Roots)                                          | -720.9    | -720.9       | -720.9  |
| Forest Operations                                                                 | 15.2      | 14.5         | 15.5    |
| Biofuel Production                                                                |           |              | 1.1     |
| Biofuel transportation and combustion                                             |           |              | 140.5   |
| Pile burning                                                                      |           | 145.1        |         |
| Emissions from litter and mineral soil                                            | 1543.3    | 1397.0       | 1397.0  |
| Total                                                                             | -916.2    | -828.5       | -831    |

In calculation of net CO<sub>2</sub> removal we consider life cycle CO<sub>2</sub> emissions by transportation and combustion stage is 0.8gCO<sub>2</sub>e/MJ and 73.2 gCO<sub>2</sub>e/MJ<sup>14,15</sup>. Hence, 44 MT produces 1.5 MT of CO<sub>2</sub> eq from transportation and ~139 MT eq of CO<sub>2</sub> emissions from combustion, total of 140.5ton eq CO<sub>2</sub>.

#### References:

- 1 A. C. Dimian, Ed., in *Computer Aided Chemical Engineering*, Elsevier, 2003, vol. 13, pp. 571–604.
- 2 S. H. Mousavi-Avval and A. Shah, *Renewable and Sustainable Energy Reviews*, 2021, **149**, 111340.
- 3 M. Fernanda Rojas Michaga, S. Michailos, M. Akram, E. Cardozo, K. J. Hughes, D. Ingham and M. Pourkashanian, *Energy Conversion and Management*, 2022, **255**, 115346.
- 4 M. Finkelstein, B. H. Davison and J. D. McMillan, *Biotechnology for Fuels and Chemicals: The Twenty-Third Symposium*, Springer Science & Business Media, 2012.
- 5 S. H. Mousavi-Avval, S. Khanal and A. Shah, *Sustainability*, 2023, **15**, 10589.
- 6 Z. Li, N. Li, N. Wang, B. Zhou, J. Yu, B. Song, P. Yin and Y. Yang, *RSC Adv*, **12**, 5509–5516.
- 7 C. Niu, M. Xia, C. Chen, Z. Ma, L. Jia, B. Hou and D. Li, *Applied Catalysis A: General*, 2020, **601**, 117630.
- 8 S. Mitsuoka, K. Murata, T. Hashimoto, N. Chen, Y. Jonoo, S. Kawabe, K. Nakao and A. Ishihara, *ACS Omega*, 2024, **9**, 3669–3674.
- 9 Simultaneous Absorption of CO<sub>2</sub> and H<sub>2</sub>S Into Aqueous Blends of N-Methyldiethanolamine and Diethanolamine | *Environmental Science & Technology*, <https://pubs.acs.org/doi/10.1021/es0606475>, (accessed May 9, 2024).
- 10 P. Spath, A. Aden, T. Eggeman, M. Ringer, B. Wallace and J. Jechura, *Biomass to Hydrogen Production Detailed Design and Economics Utilizing the Battelle Columbus Laboratory Indirectly-Heated Gasifier*, National Renewable Energy Lab. (NREL), Golden, CO (United States), 2005.
- 11 K. Im-orb, L. Simasatitkul and A. Arpornwichanop, *Energy*, 2016, **94**, 483–496.
- 12 N. Lümmer and E. Røstbø, *Energy*, 2020, **211**, 118996.
- 13 Soil organic carbon change can reduce the climate benefits of biofuel produced from forest residues - ScienceDirect, <https://www.sciencedirect.com/science/article/pii/S2542435123005378>, (accessed April 13, 2024).
- 14 Understanding variability in petroleum jet fuel life cycle greenhouse gas emissions to inform aviation decarbonization | *Nature Communications*, <https://www.nature.com/articles/s41467-022-35392-1>, (accessed April 15, 2024).
- 15 E. Yoo, U. Lee and M. Wang, *ACS Sustainable Chem. Eng.*, 2022, **10**, 8725–8732.
